# Supplementary material for: Construction of a multidimensional CdS@MoS2heterojunction for enhancing the activity and transfer efficiency of photogenerated carriers
Source: Royal Society of Chemistry journal article supplement (doi:10.1039/d2nj01043g), 2022-01-01
Supplement: d2nj01043g1.pdf [file d2nj01043g1.pdf]

## Supporting Information

### **Construction of Multidimensional CdS@MoS<sub>2</sub> Heterojunction for Enhanced Solar-to-hydrogen Conversion Performance**

Wenxuan Ma,<sup>†</sup> Chenggong Zhang,<sup>†</sup> Shuhua Hao, Yupeng Xing, Gang Zhao,\* Shipeng  
Qiu, Changwen Zhang,\* Xiaoke Wang

School of Physics and Technology, University of Jinan, Jinan 250022, P. R. China

\* Corresponding address: sps\_zhaog@ujn.edu.cn; [zhchwsd163@163.com](mailto:zhchwsd163@163.com);

<sup>†</sup>These authors contributed equally to this work.

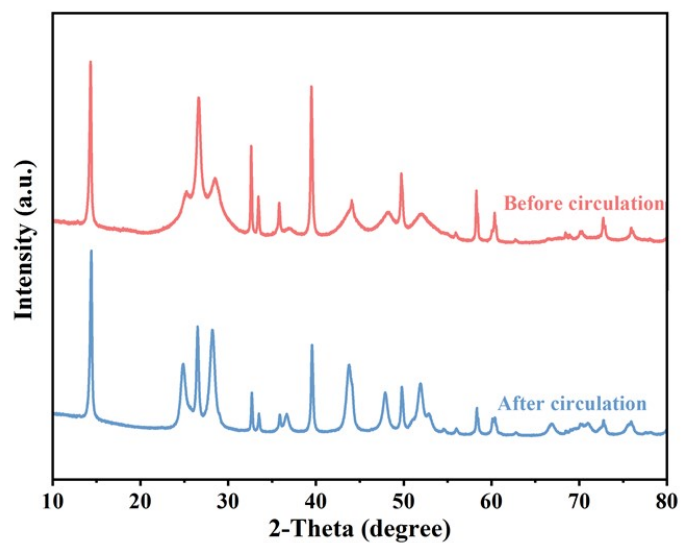

Figure S1. XRD spectra of CdS@MoS<sub>2</sub> composites before and after cycling

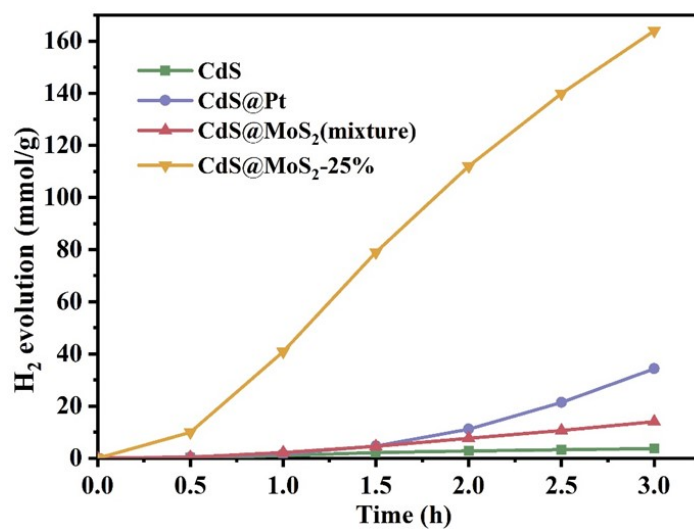

Figure S2. Photocatalytic performance test of different catalysts

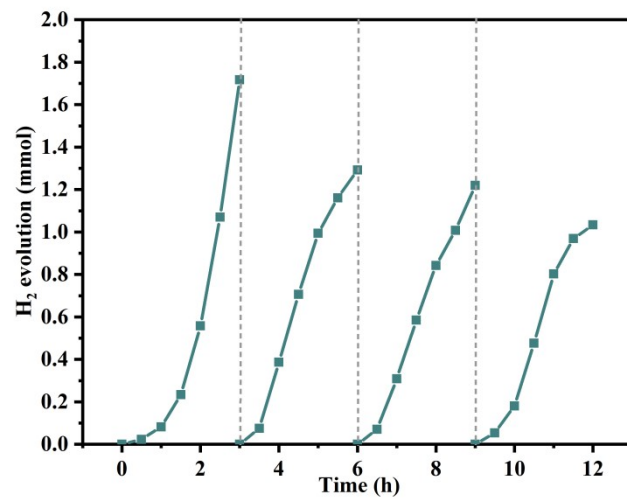

**Figure S3.** Photocatalytic cycle test of CdS@Pt

**Table S1**

Comparison and summary of recent literature reports on the hydrogen evolution performance.

| Samples                     | Light source              | Catalyst<br>Mass<br>mg | Optical<br>property | Solution            | Materials<br>loading | HER rate ( $\mu\text{mol h}^{-1}\text{cm}^{-2}$ ) |
|-----------------------------|---------------------------|------------------------|---------------------|---------------------|----------------------|---------------------------------------------------|
| CdS/MoS <sub>2</sub>        | Xe lamp (300W)            | 20                     | 200-1400 nm         | 20 vol% lactic acid | /                    | 1367                                              |
| MoS <sub>2</sub> /CdS/N-RGO | Xe lamp (150W)            | 30                     | 400-600 nm          | 10 vol% lactic acid | /                    | 5266                                              |
| CdS/MoS <sub>2</sub>        | Xe lamp (300W)<br>>420 nm | 200                    | 400-700 nm          | 10 vol% lactic acid | /                    | 498                                               |
| CdS/MoS <sub>2</sub>        | Xe lamp (300W)<br>>400 nm | 20                     | 200-800 nm          | 20 vol% lactic acid | /                    | 957                                               |
| CdS/Graphene                | Xe lamp (350W)<br>>400 nm | 50                     | 200-800 nm          | 10 vol% lactic acid | 1.0 wt% Pt           | 189                                               |

- [1] K. Zhang, W. J Kim, M. Ma, X. J. Shia, J. H. Park, Tuning the charge transfer route by p–n junction catalysts embedded with CdS nanorods for simultaneous efficient hydrogen and oxygen evolution, *J. Mater. Chem. A* 3 (2015) 4803-4810. <https://doi.org/10.1039/C4TA05571C>.
- [2] X. L. Yin, L. L. Li, W. J. Jiang, Y. Zhang, X. Zhang, L. J. Wan, J. S. Hu, MoS<sub>2</sub>/CdS Nanosheets-on-Nanorod Heterostructure for Highly Efficient Photocatalytic H<sub>2</sub> Generation under Visible Light Irradiation, *ACS Appl. Mater. Interfaces* 8 (2016) 15258-15266. <https://doi.org/10.1021/acsami.6b02687>.
- [3] J. He, L. Chen, F. Wang, Y. Liu, P. Chen, C. T. Au, S. F. Yin, CdS Nanowires Decorated with Ultrathin MoS<sub>2</sub> Nanosheets as an Efficient Photocatalyst for Hydrogen Evolution, *ChemSusChem* 9 (2016) 624-630. <https://doi.org/10.1002/cssc.201501544>.
- [4] Y. Xia, B. Cheng, J. Fan, J. Yu, G. Liu, Unraveling Photoexcited Charge Transfer Pathway and Process of CdS/Graphene Nanoribbon Composites Toward Visible-Light Photocatalytic Hydrogen Evolution, *Small* 15 (2019) e1902459. <https://doi.org/10.1002/sml.201902459>.
- [5] T. M. Di, B. Cheng, W. K. Ho, J. G. Yu, H. Tang, Hierarchically CdS-Ag<sub>2</sub>S nanocomposites for efficient photocatalytic H<sub>2</sub> production, *Appl. Surf. Sci.* 470 (2019) 196-204. <https://doi.org/10.1016/j.apsusc.2018.11.010>.
- [6] S. Ma, J. Xie, J. Q. Wen, K. L. He, X. Li, W. Liu, X. C. Zhang, Constructing 2D layered hybrid CdS nanosheets/MoS<sub>2</sub> heterojunctions for enhanced visible-light photocatalytic H<sub>2</sub> generation, *Appl. Surf. Sci.* 391 (2017) 580-591. <http://dx.doi.org/10.1016/j.apsusc.2016.07.067>.
- [7] F. J. Zhang, X. Li, X. Y. Sun, C. Kong, W. J. Xie, Z. Li, J. Liu, Surface partially oxidized MoS<sub>2</sub> nanosheets as a higher efficient cocatalyst for photocatalytic hydrogen production, *Appl. Surf. Sci.* 487 (2019) 734-742. <https://doi.org/10.1016/j.apsusc.2019.04.258>.

[8] H. F. Lin, Y. Y. Li, H. Y. Li, X. Wang, Multi-node CdS hetero-nanowires grown with defect-rich oxygen-doped MoS<sub>2</sub> ultrathin nanosheets for efficient visible-light photocatalytic H<sub>2</sub> evolution, *Nano Res.* 10 (2017) 1377-1392.

<https://doi.org/10.1007/s12274-017-1497-3>.

[9] Q. Q. Liu, J. Y. Shen, X. H. Yu, X. F. Yang, W. Liu, J. Yang, H. Tang, H. Xu, H. M. Li, Y. Y. Li, J. S. Xu, Unveiling the origin of boosted photocatalytic hydrogen evolution in simultaneously (S, P, O)-Codoped and exfoliated ultrathin g-C<sub>3</sub>N<sub>4</sub> nanosheets, *Appl. Catal. B-Environ.* 248 (2019) 84-94.

<https://doi.org/10.1016/j.apcatb.2019.02.020>.
